1 **From bedside to bench and back: discovery of a novel missense**  
2 **variant in NLRP3 causing atypical CAPS with hearing loss as the**  
3 **primary presentation, responsive to anti-IL-1 therapy**

4 **Merav Birk-Bachar<sup>1</sup>, Hadar Cohen<sup>2</sup>, Efrat Sofrin-Drucker<sup>3,6,7</sup>, Nesia Kropach-Gilad<sup>3,6,7</sup>,**  
5 **Naama Orenstein<sup>3,6,7</sup>, Gabriel Lidzbarsky<sup>6</sup>, Liora Kornreich<sup>4,7</sup>, Rotem Tal<sup>1,7</sup>, Gil**  
6 **Amarilyo<sup>1,7</sup>, Yoel Levinsky<sup>1,7</sup>, Meirav Sokolov<sup>5,7</sup>, Eyal Raveh<sup>5,7</sup>, Motti Gerlic<sup>2</sup> †, Liora**  
7 **Harel<sup>1,7</sup> †**

8 †These authors contributed equally to this work and share senior authorship

9  
10 <sup>1</sup> Pediatric Rheumatology Unit, Schneider Children's Medical Center of Israel, Petach-Tikva,  
11 Israel

12 <sup>2</sup> Department of Clinical Microbiology and Immunology, Sackler Faculty of Medicine, Tel  
13 Aviv University, Tel-Aviv, Israel

14 <sup>3</sup> Genetics Unit, Schneider Children's Medical Center of Israel, Petach-Tikva, Israel

15 <sup>4</sup> Pediatric Imaging Unit, Schneider Children's Medical Center of Israel, Petach-Tikva, Israel

16 <sup>5</sup> Pediatric Ear Nose and Throat Unit, Schneider Children's Medical Center of Israel, Petach-  
17 Tikva, Israel

18 <sup>6</sup> Recanati Genetic Institute, Rabin Medical Center-Beilinson Hospital, Petach Tikva, Israel

19 <sup>7</sup> Sackler Faculty of Medicine, Tel Aviv University, Tel-Aviv, Israel

20 **\*Correspondence;**

21 Dr. Merav Birk-Bachar – Merav.birk@gmail.com

22 Associate Prof. Motti Gerlic – mgerlic@tauex.tau.ac.il

23 Prof. Liora Harel - liorahar@clalit.org.il

24

25

26 **Number of words in manuscript:** 4308 **Number of figures:** 6

27

28 **Keywords: Inflammasome, caspase-1, deafness, anakinra, sensori-neural,**  
29 **autoinflammation**

30 **ABSTRACT**

31 Cryopyrin-associated periodic syndromes (CAPS) also known as NLRP3-associated  
32 auto-inflammatory diseases, are a spectrum of rare auto-inflammatory diseases caused by  
33 gain-of-function mutations in the NLRP3 gene, resulting in inflammasome hyper-activation and  
34 dysregulated release of Interleukin-1 $\beta$  (IL-1 $\beta$ ). Many patients with CAPS develop progressive  
35 sensorineural hearing loss (SNHL) due to cochlear auto-inflammation which, in rare cases,  
36 may be the sole manifestation. This study was undertaken to establish the suspected diagnosis  
37 of CAPS in a family presenting autosomal dominant progressive/acute SNHL and a novel  
38 missense variant in the NLRP3 gene of unknown significance (NM\_001079821:c.1790G>A,  
39 p.Ser597Asn). To do so, we conducted an ex vivo functional assessment of the NLRP3  
40 inflammasome in carriers (n=10) and healthy family members (n=5). The assay revealed  
41 hyper-activation of the inflammasome among carriers, supporting the hypothesis that this  
42 missense variant is a pathogenic gain-of-function mutation. Administration of anti-IL-1  
43 therapy resulted in a substantial clinical improvement among pediatric patients, who  
44 exhibited near resolution of hearing impairment within 1-3 months of treatment. Our findings  
45 highlight the crucial role of early diagnosis and treatment of hearing loss due to  
46 hyperactivation of the inflammasome with an anti-IL-1 agent in reversing cochlear damage.  
47 Furthermore, our results suggest that high and ultrahigh frequency ranges need to be included  
48 in the auditory assessment to enable early detection of subclinical SNHL. Finally,  
49 incorporating functional inflammasome assessment as part of the clinical evaluation could  
50 establish the diagnosis in inconclusive cases.

51

52 **Introduction**

53 The NLRP3 inflammasome[1] is an intracellular innate immune sensor expressed in  
54 immune cells, including monocytes and macrophages. Gain-of-function mutations in the  
55 NLRP3 gene lead to hyperactivation of the NLRP3 inflammasome, resulting in the  
56 inappropriate release of inflammatory cytokines, including IL-1 $\beta$ , and causing a spectrum of  
57 autosomal-dominant systemic autoinflammatory diseases called cryopyrin-associated  
58 periodic syndromes (CAPS) or NLRP3-associated autoinflammatory diseases (NLRP3-  
59 AIDs)[2,3]. The CAPS spectrum includes three classical clinical subtypes: neonatal-onset  
60 multisystem inflammatory disease (NOMID, MIM 607115), Muckle-Wells syndrome (MWS,  
61 MIM 191900), and familial cold autoinflammatory syndrome (FCAS, MIM 120100). The age  
62 at onset, as well as the severity of symptoms, vary within this spectrum and include recurrent  
63 fever, typical urticaria-like rash, headache, conjunctivitis, and arthralgia or arthritis.[3] Many  
64 of these patients, particularly those with the more severe phenotypes, also develop  
65 progressive sensorineural hearing loss (SNHL) due to cochlear auto-inflammation(Yamada et  
66 al., 2022(. In rare cases, SNHL may be the primary finding, and it was suggested that cochlear  
67 auto-inflammation was caused by hyper-activation of the NLRP3 inflammasome in tissue-  
68 resident macrophage/monocyte-like cells[5,6].

69 Inflammasomes are a group of cytosolic protein complexes located mainly in myeloid  
70 lineage cells that are formed to mediate host immune responses to microbial infection and  
71 cellular damage [7]. The NLRP3 inflammasome activation process is dependent on a two-  
72 signal sequence. In the absence of either signal, the inflammasome remains inactive. The first  
73 "priming" step, initiated by either pathogen-associated molecular pattern molecules  
74 (PAMPs), danger-associated molecular patterns (DAMPs), or pro-inflammatory cytokines,  
75 activates transcriptional factors NF- $\kappa$ B/AP1, resulting in the upregulation of inflammasome  
76 components as pro-caspase-1 and pro-inflammatory cytokines (i.e., pro-IL-1 $\beta$  and pro-IL-18).  
77 The second "activating" step, initiated by the recognition of either PAMPs or DAMPs, results  
78 in the oligomerization of inflammasome protein components [8]. Inflammasome formation  
79 then leads to auto-cleavage of caspases-1 and subsequent cleavage of gasdermin-D  
80 (GSDMD), which tends to translocate to the outer membrane to form pores and subsequently  
81 induce pyroptotic cell death. Inflammasome activation also cleaves pro-IL-1 $\beta$  and pro-IL-18  
82 to their mature and active forms, which are then released through the GSDMD pores, creating  
83 a proinflammatory cascade [9,10]. In the case of NLRP3 gain-of-function mutations, the  
84 threshold for inflammasome activation may be either impaired or totally lost, resulting in  
85 inappropriate activation of the inflammasome. This hyperactivity is classically demonstrated  
86 *ex-vivo* by measuring levels of IL-1 $\beta$  in supernatants of PBMCs, in response to NF- $\kappa$ B  
87 stimulation alone (priming signal).

88 In this study, we present a family that initially presented with autosomal dominant  
89 SNHL and a novel variant in the NLRP3 gene of unknown significance, which did not meet  
90 CAPS classification criteria. By conducting an *ex-vivo* functional assessment of the NLRP3  
91 inflammasome, which showed inflammasome hyperactivity, we strengthened the suspected  
92 diagnosis of CAPS. Finally, following this assessment, we applied an anti-IL-1 treatment that  
93 resulted in a rapid substantial clinical hearing improvement in young patients.

94 **Results**

95 **Hearing loss as the main or sole presentation of CAPS**

96 The proband, a two-year-old boy at the time of study initiation (III1), was initially  
97 referred to the Pediatric Rheumatology Unit due to recurrent episodes of fever and was  
98 eventually clinically diagnosed with PFAPA (periodic fever, aphthous stomatitis, pharyngitis,  
99 and adenitis). Family history revealed six family members spanning three generations who  
100 had previously been diagnosed with autosomal dominant, bilateral, progressive SNHL  
101 (Figure 1A, Table 1). The eldest (1<sup>st</sup> generation) and most severely affected patient was the  
102 proband's >70-year-old grandmother (patient I4). She described progressive hearing loss  
103 commencing at age 15-20, as well as two episodes of unilateral (left) acute sensorineural  
104 hearing loss over the years that partially responded to steroid treatment (Figure 2). She  
105 eventually underwent left cochlear implantation at age 50-55. In addition, she suffered from  
106 infrequent short episodes of arthritis/arthralgia over the years (Table 1). She denied recurrent  
107 episodes of fever (as well as cold-induced episodes), rash, or uveitis/keratitis. Three family  
108 members (2<sup>nd</sup> generation), all in their late 30's or early 40's, were affected (patients II2, II4,  
109 and II6). They suffered from symmetrical bilateral mild to severe hearing loss and were  
110 hearing aid-dependent (Figure 2). In all cases, hearing impairment was initially diagnosed in  
111 their early 20's, without additional pathognomonic systemic CAPS manifestations. One  
112 patient (II6) reported a past episode of unilateral acute hearing loss that did not respond to  
113 steroid treatment, another reported episodes of arthritis during childhood (II2), and the third  
114 sibling (II4) reported PFAPA-like episodes during childhood. Baseline inflammatory markers  
115 were mostly within the normal range in these four patients, except for patient I4 (minimally  
116 elevated CRP) and patient II2 (slightly elevated SAA) (Table 2).

117 In contrast to the above 1<sup>st</sup> and 2<sup>nd</sup> generation carriers, who all suffered from  
118 prolonged and severe SNHL, most of the 3<sup>rd</sup> generation carriers (15 or younger) had normal  
119 hearing function (Supplemental Figure 1). Out of the nine known 3<sup>rd</sup> generation carriers, only  
120 three children suffered from hearing loss (patients III2, III4, and III5) (Figure 2 and  
121 Supplemental Figure 1C-D). Two suffered bilateral progressive SNHL; one, who initially  
122 presented with normal hearing function, was diagnosed with acute unilateral sensorineural  
123 hearing deterioration during the study period (patients III4, III5, and III2, respectively). It  
124 should be emphasized that all three children were initially diagnosed through annual auditory  
125 tests conducted considering the family history rather than due to any complaint of hearing  
126 loss at the time. No other typical CAPS signs or symptoms were present. However, both  
127 patients III4 and III5 (proband's siblings) reported PFAPA-like episodes that resolved in the  
128 first grade. Inflammatory markers were within normal range except for minimally elevated  
129 CRP in patient III4, and mildly elevated SAA in patient III2. It should be noted that during  
130 the initial asymptomatic period, SAA levels were within normal limits; they increased in  
131 parallel to the rapid deterioration in her hearing function.

132 High-resolution MRI of the temporal bones were performed on all affected family  
133 members excluding the grandmother (due to technical constraints), with no signs of cochlear  
134 inflammation in the late gadolinium enhancement phase.

135

### 136 **Earlier detection of SNHL in ultra-high frequencies auditory evaluation**

137 All but one affected subject suffered from progressive bilateral SNHL with a down-  
138 sloping audiometric configuration and gradual deterioration over the years (Figure 2). The  
139 SNHL pattern varied among patients, though most suffered symmetric hearing loss  
140 (Supplemental Figure 1B). Two of these subjects (patients I4 and II6) also reported past  
141 episodes of unilateral acute SNHL, which had been treated with oral steroids. One of them  
142 reported partial improvement (I4). Over the course of the study, patient III2, a seven-year-old  
143 female who initially presented with normal hearing function, suffered from acute  
144 sensorineural hearing deterioration in her right ear that solely involved the high-ultrahigh  
145 ranges (Figure 2). She was diagnosed in her routine semiannual checkup which included  
146 these frequency ranges. Patient I4 suffered from bilateral hearing deterioration over the years  
147 (Figure 2) until the left ear reached profound SNHL and required cochlear implantation. Age-  
148 eligible carriers (three symptomatic and two asymptomatic children ages 6-12) ultra-high  
149 frequencies (8KHz–16KHz) were also assessed. In all cases, the hearing deterioration was  
150 observed in the high and ultrahigh frequencies earlier than at the low frequencies (Figure 2).  
151 Pure-tone audiometry did not reveal a significant air-bone gap in any of the affected  
152 individuals.

### 153 **Identification of a novel NLRP3 variant in all patients**

154 Patient II6 from family 1 was the first in that family to undergo molecular analysis  
155 using the Otoscope Genetic Hearing Loss next-generation sequencing (NGS) gene panel (The  
156 University of Iowa, Iowa City, Iowa), including 133 genes related to hearing loss. A  
157 heterozygous novel variant of unknown significance NM\_001079821.3:c.1784G>A  
158 p.Ser595Asn (also known as NM\_001079821:c.1790G>A, p.Ser597Asn) was reported on  
159 exon 5 (coding exon 3) of the NLRP3 gene (Figure 1B). It was predicted to result in a  
160 missense substitution. The genomic position does not correspond with a known domain in the  
161 NLRP3 protein (Figure 1B). However, a pathogenic variant at the same amino acid position  
162 (1783A>G p.Ser595Gly) related to CINCA syndrome was reported [11,12].

163 In the unrelated Family 2, patient 2.1 was diagnosed with Muckle-Wells Syndrome,  
164 based on a classical clinical presentation and genetic results. An auto-inflammatory  
165 syndromes panel (Invitae Corporation, San Francisco, California) revealed a heterozygous  
166 likely pathogenic variant c.1218G>C, p.Met406Ile in NLRP3 (NM\_001079821.3) and a  
167 heterozygous variant of uncertain clinical significance in NCF2. Following parental  
168 segregation testing the variant in NLRP3 was found to be de-novo. The NLRP3 variant is  
169 located in the NACHT domain (exon 5).

170 It should be noted that in family 1a the father (III1) of the proband suffered from early-  
171 onset hearing loss (non-SNHL). The hearing loss gene panel did not reveal variants in his  
172 NLRP3 gene.

173

174

175 **NM\_001079821:c.1790G>A variant carriers present functional NLRP3 inflammasome**  
176 **hyper activation *ex-vivo***

177 In order to assess whether NM\_001079821:c.1790G>A, p.Ser597Asn NLRP3 variant results  
178 in inflammasome hyperactivity, we measured the levels of IL-1 $\beta$  secretion of peripheral-  
179 blood mononuclear cells (PBMCs) isolated from our patients, in response to priming signal  
180 alone (LPS or LPS+CaCl<sub>2</sub>) and in comparison to healthy controls. For technical reasons  
181 (patient recruitment to the clinic), we conducted several independent cycles of the  
182 experiment. In each cycle, we isolated PBMCs from both NLRP3 variation carriers  
183 (c.1790G>A, p.Ser597Asn) and healthy generation-matched family members as controls.  
184 Baseline IL-1 $\beta$  secretion levels (none treated) were comparable among all subjects.  
185 Stimulation with LPS or LPS+CaCl<sub>2</sub>, resulted in higher IL-1 $\beta$  secretion from NLRP3  
186 variation carriers PBMCs compared to healthy subjects (Figure 3). The specificity of these  
187 results to the NLRP3 inflammasome activation was confirmed by using the specific NLRP3  
188 inhibitor, MCC950, or the specific caspase-1 inhibitor, VX-765. The addition of these  
189 inhibitors to PBMCs prior to their priming by LPS+CaCl<sub>2</sub> resulted in the reduction of  
190 elevated IL-1 $\beta$  secretion in all subjects except of one (Figure 3B, C). The control, Muckle-  
191 Wells pediatric patient with a known pathogenic variant in NLRP3 (NM\_004895.4  
192 c.1224G>C (p.Met408Ile), showed similar results (Figure 3D). Finally, these results were  
193 further statistically confirmed by pooling the three independent experiments and calculating  
194 the fold of change (FC) of IL-1 $\beta$  secretion between each treatment to the non-treated PBMCs  
195 (Figure 3E).

196 To complement IL-1 $\beta$  secretion measurement, we analyzed the expression and  
197 cleavage of several NLRP3 inflammasome activation hallmarks: caspase-1, GSDMD, and IL-  
198 1 $\beta$  using immunoblot and specific antibodies. As can be seen in Figure 3G, pro-caspase-1,  
199 pro-IL-1 $\beta$ , and full-length GSDMD were detected in the PBMCs of NLRP3 variation carrier  
200 (subject I4) prior to LPS stimulation whilst remaining at undetected levels in the healthy  
201 control (subject no.2). Furthermore, in agreement with IL-1 $\beta$  secretion phenotype, GSDMD  
202 and caspase-1 in NLRP3 variation carrier PBMCs were detected in their activated (cleaved)  
203 state (Figure 3D). Overall, these *ex-vivo* functional results suggest that c.1790G>A,  
204 p.Ser597Asn is a gain-of-function mutation that results in a constitutively unique semi-  
205 activated basal state of the NLRP3 inflammasome.

206

207 **Substantial hearing improvement in response to IL-1R antagonist treatment (Anakinra)**

208 The clinical presentation, family segregation of the novel variant, and evidence of  
209 inflammasome hyper-activation in the above *ex-vivo* functional studies suggest that the novel  
210 variant 001079821:c.1790G>A,p.Ser597Asn is a pathogenic gain-of-function mutation-  
211 causing atypical CAPS phenotype, according to the Eurofever classification criteria [13].  
212 Thus, we decided to treat the affected patients with an interleukin-1 receptor antagonist (IL-  
213 1Ra) drug, which blocks IL-1 $\beta$  activity. Therapy with IL-1Ra (Anakinra) was consequently  
214 administered at an initial dose of 3 mg/kg (up to 100 mg) daily. Clinical follow-up included  
215 clinical and hearing assessment as well as the measurement of inflammatory markers 1-3  
216 months post-treatment initiation (Tables 2, 3). Audiometry reassessment was conducted one



217 and three months after treatment initiation. The three affected children showed rapid and  
218 near-complete reversal of hearing impairment, and returned to near-normal hearing function  
219 within 1-3 months (Figure 4). Among the three 2<sup>nd</sup> generation subjects, we observed minimal  
220 asymmetrical improvement in hearing function (Figure 5). Although the grandmother (patient  
221 I4) with the cochlear implant did not report any improvement in hearing function, she did  
222 report a resolution of arthralgia within two weeks of treatment initiation. In addition, all her  
223 initially slightly elevated inflammatory markers returned to normal within one month of  
224 treatment (Table 2.).

225 No severe adverse reactions to Anakinra were reported.

226

## 227 **Discussion**

228 Gain-of-function mutations in the NLRP3 gene led to hyper-activation of the NLRP3  
229 inflammasome, resulting in excessive secretion of inflammatory cytokines such as IL-1 $\beta$  and  
230 IL-18. Clinically these mutations cause a spectrum of autosomal-dominant systemic  
231 autoinflammatory diseases known as CAPS/NLRP3-AIDs. In addition to the three classical  
232 clinical subtypes of CAPS (NOMID, MWS, and FCAS), there have been a few reports of  
233 NLRP3 missense variants associated with progressive sensorineural hearing loss as the  
234 primary/sole clinical manifestation [5,6,14].

235 In this study, we presented family members spanning three generations with a novel  
236 missense variant in the NLRP3 gene of unknown significance (NM 001079821:c.1790G>A,  
237 p.Ser597Asn), with clinical features inconsistent with classical CAPS (i.e., past history of  
238 PFAPA, sparse episodes of isolated fever, and nonspecific past history of arthralgia/arthritis).  
239 Even though they did not meet the classification criteria for CAPS [13], the familial  
240 genotype-phenotype segregation and potentially treatable hearing loss (autosomal dominant  
241 progressive/rapid/mixed SNHL) led us to explore the suspected diagnosis of atypical CAPS.  
242 Thus, in the hope of establishing the suspected diagnosis and enabling prompt initiation of  
243 appropriate anti-IL-1 therapy, we conducted further clinical, imaging, and functional  
244 inflammasome assessment.

245 Autosomal dominant progressive SNHL initially affected the high and ultrahigh  
246 frequency range (as seen in pediatric patients III2 and III4) and progressed to severe  
247 impairment involving lower frequencies also in adult patients (Figure 2). In addition to the  
248 typical CAPS-associated bilateral progressive deterioration [15], some subjects suffered from  
249 an atypical pattern of acute unilateral hearing loss (I4 and II6) (Figure 2). In the course of this  
250 study, subject III2, a 5-10-year-old female who initially presented normal hearing function,  
251 suffered from unilateral rapid sensorineural hearing deterioration that involved only the high-  
252 ultrahigh ranges (Figure 2). It should be noted that she had no auditory complaints and was  
253 diagnosed in her routine semiannual checkup which included these frequency ranges. To the  
254 best of our knowledge, this is the first report of isolated acute hearing loss among CAPS  
255 patients. Furthermore, the prompt initiation of Anakinra treatment in this patient, which led to  
256 nearly complete resolution of SNHL (Figure 4), highlights the importance of both the routine  
257 auditory evaluation of the high-ultrahigh ranges and rapid anti-IL-1 intervention treatment.

258 Interestingly, although the affected adults reported hearing impairment onset in their  
259 early 20's, early symptomatic and asymptomatic changes in the high and ultrahigh-frequency  
260 ranges were detected among the affected children as early as five years of age (Figure 2F-H).  
261 This could be explained either by phenotypic progression over generations, increased  
262 awareness of hearing impairment among family members, or merely thanks to early detection  
263 in semiannual hearing function tests starting from infancy that specifically included the high  
264 and ultrahigh-frequency ranges. Nevertheless, regardless of the reason for this early  
265 detection, this further supports the importance of adding these frequency ranges to the regular  
266 auditory evaluation of these patients.

267 In addition to hearing impairment, further clinical evaluation of known carriers  
268 revealed a high prevalence of PFAPA in childhood among 4/13 carriers. This is an interesting  
269 finding, as although the pathogenesis of PFAPA syndrome is unknown, it has previously  
270 been linked to inflammasome hyper-activation [16].

271 Surprisingly, a magnetic resonance imaging (MRI) of the temporal bone did not  
272 reveal any signs of cochlear inflammation among affected family members. However, it  
273 should be noted that the grandmother (I4) did not complete an MRI due to cochlear implant  
274 incompatibility. In addition, as recently described [17], cochlear MRI may be normal in some  
275 CAPS patients with SNHL and is considered a positive predictive factor for clinical response  
276 to Anakinra treatment.

277 As described, in order to further establish the diagnosis, we conducted functional  
278 assessment of the NLRP3 inflammasome activity in PBMCs of carriers vs. healthy family  
279 members. As expected, secreted IL-1 $\beta$  levels and cleavage of GSDMD and caspase-1 were  
280 substantially and significantly higher among carriers vs. healthy controls following priming  
281 without the secondary and specific activation of the NLRP3 inflammasome. These results are  
282 consistent with the dogma that in cases of gain-of-function mutations in NLR as NLRP3, IL-  
283 1 $\beta$  secretion can be induced by priming signals such as LPS.[18,19]

284 The response to Anakinra treatment was dramatic, especially among the 3<sup>rd</sup> generation  
285 pediatric patients. The three affected children showed near-complete reversal of hearing  
286 impairment and returned to near normal hearing function within 1-3 months (Figures 4, 6).  
287 Not surprisingly, the grandmother (I4), who presented the most severe and prolonged  
288 symptoms, did not report improvement in hearing function, probably as a result of  
289 irreversible cochlear damage on the right and the presence of the cochlear implant on the left.  
290 However, she did report a complete resolution of arthralgia within two weeks, and  
291 inflammatory markers normalized within a month of treatment. 2<sup>nd</sup> generation patients (II2,  
292 II4, and II6) who suffered from severe and prolonged hearing impairment (threshold below  
293 60dB in some frequencies) (Figures 2C-E) still gained an overall slight improvement in  
294 hearing function (Figures 5-6). Although this could be a result of irreversible cochlear  
295 damage after years of untreated cochlear inflammation, it could also be explained by the  
296 relatively low initial Anakinra dosage (100 ng per day). For this reason, we are currently  
297 considering increasing the daily dosage. In line with our observation, a recent study [17]  
298 categorized seventeen families diagnosed with either CAPS or atypical CAPS according to  
299 the severity of hearing impairment, MRI findings/absence of evidence of cochlear



300 inflammation, and evidence of NLRP3 hyper-activation (according to an in vitro LPS  
301 stimulation test). They suggested that a hearing function threshold below 60dB prior to  
302 Anakinra (Anti-IL-1) treatment and cochlear enhancement on brain MRI are related to poor  
303 audiological prognosis and responsiveness to Anakinra therapy.

304 In summary, our findings highlight the crucial role of early diagnosis and treatment  
305 with an anti-IL-1 agent in reversing cochlear damage. Furthermore, our results suggest that  
306 high and ultrahigh frequency ranges should be included in the auditory assessment to enable  
307 early detection of subclinical SNHL. Finally, functional inflammasome assessment can  
308 establish the diagnosis in inconclusive cases.  
309

## 310 **Material and methods**

### 311 **Patients**

312 A family of Jewish Ashkenazi descent initially presented with autosomal dominant  
313 bilateral SNHL with a progressive/rapid/mixed deterioration pattern. The hearing impairment  
314 initially affected high/ultra-high frequencies as an isolated presentation or was accompanied  
315 by nonspecific systemic signs and symptoms inconsistent with typical CAPS (i.e., sporadic  
316 episodes of fever, arthritis/arthritis, or PFAPA (periodic fever, aphthous stomatitis,  
317 pharyngitis, adenitis)). All SNHL family members were carriers of a novel missense mutation  
318 in NLRP3 of unknown significance and did not fulfill CAPS classification criteria [13]  
319 (Figure 1A, Table 1). We assessed ten known carriers spanning three generations who were  
320 found to be carriers of the NLRP3 variant, seven with impaired and three with normal hearing  
321 function. Age at study initiation ranged from 2-70 years. The control group consisted of five  
322 healthy family members who were matched by age group. Our study group also included one  
323 unrelated 5-10-year-old patient (P 2.1) who presented with classical signs and symptoms of  
324 Muckle-Wells and is a carrier of a known heterozygous pathogenic variant (NM\_004895.4)  
325 in NLRP3. This patient served as a positive control for inflammasome hyperactivation in the  
326 study.

327

### 328 **Clinical and genetic evaluation**

329 Affected family members underwent clinical evaluation by a clinical rheumatologist,  
330 otorhinolaryngologist, and a clinical geneticist. Medical records and past audiometry tests  
331 were reviewed. Clinical evaluation and peripheral blood inflammatory markers were obtained  
332 for all symptomatic patients before and after interleukin-1 receptor antagonist (IL-1Ra)  
333 (anakinra) treatment initiation. Pure-tone audiometry was performed per test eligibility (age-  
334 dependent) on all known carriers, of whom seven were symptomatic (I4, II2, II4, II6, III2,  
335 III4, III5). The ultra-high frequency range (8KHz – 16KHz) was also evaluated in patients  
336 III2, III4, III5, III7, and III9. Follow-up audiometry was conducted on all treated patients.

337 High-resolution magnetic resonance imaging (MRI) scans of the temporal bones were  
338 performed with a Philips Ingenia 3 Tesla system (Philips Healthcare). The scans included an  
339 axial heavily T2 weighted sequence (DRIVE) and a T1 weighted sequence. Following the  
340 injection of Gadolinium-based contrast media, a 3D sequence (3D FLAIR or 3D T1 Dixon)  
341 was performed.

342

### 343 ***Ex-vivo* functional assessment of NLRP3 inflammasome activity**

344 Peripheral blood samples were drawn into an EDTA tube from a total of 15 subjects  
345 (11 novel variant carriers, one Muckle-Wells patient, and three age-matched healthy family  
346 members as controls). PBMCs were immediately isolated (up to two hours from collection)  
347 as done previously [20]. See Supplementary Data for further details. Approximately  $10^5$   
348 PBMCs were seeded in each well of the 96 well plate and LPS was added to indicate wells  
349 for three hours. Where indicated, caspase-1 inhibitor, Vx765, or NLRP3 inhibitor, MCC950,  
350 were added 30 minutes prior to  $\text{CaCl}_2$  addition. Cell supernatants and cell lysates were  
351 collected three hours later for further analysis. Supernatants were analyzed for IL-1 $\beta$   
352 secretion using ELISA kit (Invitrogen Waltham, Massachusetts, USA). Cell lysates were

353 analyzed for cleaved human-IL-1 $\beta$ , cleaved caspase-1, and cleaved GSDMD using  
354 immunoblot and specific antibodies. See further details in supplementary data.

### 355 **Statistics**

356 Statistical comparisons in the *ex-vivo* experiments between the different treatments  
357 were performed using multiple unpaired t-tests. A comparison of hearing before and after  
358 Anakinra treatment was preform using RM two-way ANOVA. P values <0.05 were  
359 considered statistically significant.

### 360 **Data analysis**

361 Data were calculated using GraphPad Prism 9, and details can be found in the figure  
362 legends.

363

### 364 **Data availability statement**

365 The original contributions presented in the study are included in the  
366 article/Supplementary Material. Further inquiries can be directed to the corresponding  
367 authors.

368

### 369 **Ethics statement**

370 All experiments in this study were reviewed and approved by the ethics committee  
371 (RMC0941-20) and performed according to the Declaration of Helsinki. Prospective and  
372 retrospective reviews of medical history, laboratory and imaging results, rheumatologic  
373 evaluations, and laboratory tests were performed after informed consent. Written informed  
374 consent was obtained from adult subjects and from both parents of minor subjects.

375

### 376 **Author contributions**

377 BM initiated and designed the study concept and coordinated the multidisciplinary  
378 assessment of patients; BM, CH, and GM designed the experiments; BM, and CH performed  
379 experiments; SM, RE, and HO performed the clinical hearing evaluation; KL performed the  
380 brain image analysis; KN, SE, and ON coordinated and conducted clinical-genetic  
381 assessments; AG, DR, LG, BM, and HL, performed the clinical evaluation and management;  
382 BM, wrote the original draft; All authors wrote and edited the manuscript. HL, and GM  
383 contributed to the study conception and design and supervised the work.

384

### 385 **Funding**

386 GM acknowledges funding from US-BSF grant #2017176, ISF grant #2174/22.

### 387 **Conflict of interest**

388 The authors declare that the research was conducted in the absence of any commercial  
389 or financial relationships that could be construed as a potential conflict of interest.

390

## 391 **Acknowledgments**

392 First and foremost, we would like to extend our thanks and appreciation to all family  
393 members who participated in this study. We would also like to express gratitude to our  
394 colleagues Ivona Aksentijevich, Kalpana Manthiram, and Amanda Ombrello from the  
395 National Institute of Health; and Ziv Erlich from Tel Aviv University for their assistance  
396 throughout.

397

## 398 **Contribution to the field statement**

399 Cryopyrin-associated periodic syndromes (CAPS) are a spectrum of rare auto-  
400 inflammatory diseases caused by gain-of-function mutations in the NLRP3 gene, resulting in  
401 inflammasome hyper-activation and subsequent uncontrolled release of Interleukin-1 $\beta$  (IL-  
402 1 $\beta$ ). Many patients with CAPS develop progressive sensorineural hearing loss (SNHL) due to  
403 cochlear auto-inflammation, which in rare cases may be the sole or main manifestation. In  
404 this study, we establish the suspected diagnosis of CAPS in a family presenting autosomal  
405 dominant SNHL with progressive/acute deterioration and a novel missense variant in the  
406 NLRP3 gene of unknown significance (NM\_001079821:c.1790G>A, p.Ser597Asn), by  
407 conducting *ex-vivo* functional assessment of the NLRP3 inflammasome. Subsequent  
408 administration of anti-IL-1 therapy resulted in a substantial clinical improvement especially  
409 among pediatric patients who exhibited near resolution of hearing impairment within a few  
410 months of treatment. Our findings highlight the crucial role of early diagnosis and treatment  
411 with an anti-IL-1 agent in reversing cochlear damage. Furthermore, our results suggest that  
412 high and ultrahigh frequency ranges need to be included in the auditory assessment to enable  
413 early detection of subclinical SNHL. Finally, incorporating functional inflammasome  
414 assessment as part of the clinical evaluation could establish the diagnosis in inconclusive  
415 cases.

416

417 **References**

- 418 1. Schroder K, Tschopp J. The Inflammasomes. *Cell*. 2010;140:821–32.
- 419 2. Broide DH, Hoffman HM, Mueller JL, Broide DH. Mutation of a new gene encoding a  
420 putative pyrin-like protein causes familial cold autoinflammatory syndrome and Muckle–  
421 Wells syndrome. *Nat Genet* [Internet]. 2001 [cited 2021 Oct 4];29:301–5. Available from:  
422 [https://brmc.tdnetsdiscover.com/results/mendeleycallback?token=ui.export.mendeley.f84a5b1](https://brmc.tdnetsdiscover.com/results/mendeleycallback?token=ui.export.mendeley.f84a5b1b-d635-42da-a44e-5e813cdd9066&returnUrl=/discover/result?logSearchID=77717782&pubid=7156-oai%3Apubmedcentral.nih.gov%3A4322000&pubid=7902-info%3Adoi%2F10.1038%252Fng756&pubid=6057-medline%3A11687797)  
423 [b-d635-42da-a44e-](https://brmc.tdnetsdiscover.com/results/mendeleycallback?token=ui.export.mendeley.f84a5b1b-d635-42da-a44e-5e813cdd9066&returnUrl=/discover/result?logSearchID=77717782&pubid=7156-oai%3Apubmedcentral.nih.gov%3A4322000&pubid=7902-info%3Adoi%2F10.1038%252Fng756&pubid=6057-medline%3A11687797)  
424 [5e813cdd9066&returnUrl=/discover/result?logSearchID=77717782&pubid=7156-](https://brmc.tdnetsdiscover.com/results/mendeleycallback?token=ui.export.mendeley.f84a5b1b-d635-42da-a44e-5e813cdd9066&returnUrl=/discover/result?logSearchID=77717782&pubid=7156-oai%3Apubmedcentral.nih.gov%3A4322000&pubid=7902-info%3Adoi%2F10.1038%252Fng756&pubid=6057-medline%3A11687797)  
425 [oai%3Apubmedcentral.nih.gov%3A4322000&pubid=7902-](https://brmc.tdnetsdiscover.com/results/mendeleycallback?token=ui.export.mendeley.f84a5b1b-d635-42da-a44e-5e813cdd9066&returnUrl=/discover/result?logSearchID=77717782&pubid=7156-oai%3Apubmedcentral.nih.gov%3A4322000&pubid=7902-info%3Adoi%2F10.1038%252Fng756&pubid=6057-medline%3A11687797)  
426 [info%3Adoi%2F10.1038%252Fng756&pubid=6057-medline%3A11687797](https://brmc.tdnetsdiscover.com/results/mendeleycallback?token=ui.export.mendeley.f84a5b1b-d635-42da-a44e-5e813cdd9066&returnUrl=/discover/result?logSearchID=77717782&pubid=7156-oai%3Apubmedcentral.nih.gov%3A4322000&pubid=7902-info%3Adoi%2F10.1038%252Fng756&pubid=6057-medline%3A11687797)
- 427 3. Hoffman HM, Booshehri L, Hoffman H. CAPS and NLRP3. *J Clin Immunol* [Internet].  
428 2019 [cited 2020 Oct 29];39:277–86. Available from:  
429 [https://brmc.tdnetsdiscover.com/results/mendeleycallback?token=ui.export.mendeley.ef50a8d](https://brmc.tdnetsdiscover.com/results/mendeleycallback?token=ui.export.mendeley.ef50a8d9-50fa-4bb2-bd54-1e67a1880575&returnUrl=/discover/result?logSearchID=56293390&pubid=7109-springer%3A10.1007%2Fs10875-019-00638-z&pubid=7902-info%3Adoi%2F10.1007%252Fs10875-019-00638-z&pubid=6057-medline%3A31077002)  
430 [9-50fa-4bb2-bd54-](https://brmc.tdnetsdiscover.com/results/mendeleycallback?token=ui.export.mendeley.ef50a8d9-50fa-4bb2-bd54-1e67a1880575&returnUrl=/discover/result?logSearchID=56293390&pubid=7109-springer%3A10.1007%2Fs10875-019-00638-z&pubid=7902-info%3Adoi%2F10.1007%252Fs10875-019-00638-z&pubid=6057-medline%3A31077002)  
431 [1e67a1880575&returnUrl=/discover/result?logSearchID=56293390&pubid=7109-](https://brmc.tdnetsdiscover.com/results/mendeleycallback?token=ui.export.mendeley.ef50a8d9-50fa-4bb2-bd54-1e67a1880575&returnUrl=/discover/result?logSearchID=56293390&pubid=7109-springer%3A10.1007%2Fs10875-019-00638-z&pubid=7902-info%3Adoi%2F10.1007%252Fs10875-019-00638-z&pubid=6057-medline%3A31077002)  
432 [springer%3A10.1007%2Fs10875-019-00638-z&pubid=7902-](https://brmc.tdnetsdiscover.com/results/mendeleycallback?token=ui.export.mendeley.ef50a8d9-50fa-4bb2-bd54-1e67a1880575&returnUrl=/discover/result?logSearchID=56293390&pubid=7109-springer%3A10.1007%2Fs10875-019-00638-z&pubid=7902-info%3Adoi%2F10.1007%252Fs10875-019-00638-z&pubid=6057-medline%3A31077002)  
433 [info%3Adoi%2F10.1007%252Fs10875-019-00638-z&pubid=6057-medline%3A31077002](https://brmc.tdnetsdiscover.com/results/mendeleycallback?token=ui.export.mendeley.ef50a8d9-50fa-4bb2-bd54-1e67a1880575&returnUrl=/discover/result?logSearchID=56293390&pubid=7109-springer%3A10.1007%2Fs10875-019-00638-z&pubid=7902-info%3Adoi%2F10.1007%252Fs10875-019-00638-z&pubid=6057-medline%3A31077002)
- 434 4. Yamada S, Kita J, Shinmura D, Nakamura Y, Sahara S, Misawa K, et al. Update on  
435 Findings about Sudden Sensorineural Hearing Loss and Insight into Its Pathogenesis. *J Clin*  
436 *Med*. MDPI AG; 2022;11:6387.
- 437 5. Oziębło D, Leja ML, Jeznach A, Orzechowska M, Skirecki T, Więsik-Szewczyk E, et al.  
438 Hearing Loss as the Main Clinical Presentation in NLRP3-Associated Autoinflammatory  
439 Disease. *Front Immunol*. Frontiers Media S.A.; 2022;13.
- 440 6. Nakanishi H, Kawashima Y, Kurima K, Muskett JA, Kim HJ, Brewer CC, et al. Gradual  
441 Symmetric Progression of DFNA34 Hearing Loss Caused by an NLRP3 Mutation and  
442 Cochlear Autoinflammation. *Otology and Neurotology*. 2018;39:e181–5.
- 443 7. Schroder K, Tschopp J. The Inflammasomes. *Cell*. Elsevier B.V.; 2010. p. 821–32.
- 444 8. Lamkanfi M, Dixit VM. Mechanisms and functions of inflammasomes. *Cell*. Elsevier  
445 B.V.; 2014. p. 1013–22.
- 446 9. Erlich Z, Shlomovitz I, Edry-Botzer L, Cohen H, Frank D, Wang H, et al. Macrophages,  
447 rather than DCs, are responsible for inflammasome activity in the GM-CSF BMDC model.  
448 *Nat Immunol*. Nature Research; 2019. p. 397–406.
- 449 10. He WT, Wan H, Hu L, Chen P, Wang X, Huang Z, et al. Gasdermin D is an executor of  
450 pyroptosis and required for interleukin-1 $\beta$  secretion. *Cell Res*. Nature Publishing Group;  
451 2015;25:1285–98.
- 452 11. Kanariou M, Dracou C, Spanou K, Möller J, Rösen-Wolff A, Schuster V, et al. Twenty  
453 year follow up of a patient with a new de-novo NLRP3 mutation (S595G) and CINCA  
454 syndrome. *Klin Padiatr*. 2009;221:379–81.

- 455 12. Li C, Tan X, Zhang J, Li S, Mo W, Han T, et al. Gene mutations and clinical phenotypes  
456 in 15 Chinese children with cryopyrin-associated periodic syndrome (CAPS). *Sci China Life*  
457 *Sci. Science in China Press*; 2017;60:1436–44.
- 458 13. Gattorno M, Hofer M, Federici S, Vanoni F, Bovis F, Aksentijevich I, et al. Classification  
459 criteria for autoinflammatory recurrent fevers. *Ann Rheum Dis. BMJ Publishing Group*;  
460 2019;78:1025–32.
- 461 14. Nakanishi H, Prakash P, Ito T, Kim HJ, Brewer CC, Harrow D, et al. Genetic Hearing  
462 Loss Associated With Autoinflammation. *Front Neurol.* 2020;11:1–7.
- 463 15. Nakanishi H, Yamada S, Kita J, Shinmura D, Hosokawa K, Sahara S, et al. Auditory and  
464 Vestibular Characteristics of NLRP3 Inflammasome Related Autoinflammatory Disorders:  
465 Monogenic Hearing Loss Can Be Improved by Anti-interleukin-1 Therapy. *Front Neurol.*  
466 *Frontiers Media S.A.*; 2022.
- 467 16. Kolly L, Busso N, Von Scheven-Gete A, Bagnoud N, Moix I, Holzinger D, et al. Periodic  
468 fever, aphthous stomatitis, pharyngitis, cervical adenitis syndrome is linked to dysregulated  
469 monocyte IL-1 $\beta$  production. *Journal of Allergy and Clinical Immunology.* 2013;131:1635–  
470 43.
- 471 17. Kim BJ, Kim YH, Lee S, Han JH, Lee S-Y, Seong J, et al. Otological aspects of NLRP3-  
472 related autoinflammatory disorder focusing on the responsiveness to anakinra.  
473 *Rheumatology.* 2020;1–10.
- 474 18. Nakanishi H, Kawashima Y, Kurima K, Chae JJ, Ross AM, Pinto-Patarroyo G, et al.  
475 NLRP3 mutation and cochlear autoinflammation cause syndromic and nonsyndromic hearing  
476 loss DFNA34 responsive to anakinra therapy. *Proc Natl Acad Sci U S A.* 2017;114:E7766–  
477 75.
- 478 19. Masters SL, Gerlic M, Metcalf D, Preston S, Pellegrini M, O'Donnell JA, et al. NLRP1  
479 Inflammasome Activation Induces Pyroptosis of Hematopoietic Progenitor Cells. *Immunity.*  
480 2012;37:1009–23.
- 481 20. Cohen H, Baram N, Edry-Botzer L, Munitz A, Salomon D, Gerlic M. *Vibrio* pore-  
482 forming leukocidin activates pyroptotic cell death via the NLRP3 inflammasome. *Emerg*  
483 *Microbes Infect.* Taylor and Francis Ltd.; 2020;9:278–90.
- 484
- 485



486 **Tables**

487 Table 1. Clinical characteristics of family members with sensorineural hearing loss

| Subject | Age   | Sex | Periodic fever          | Musculoskeletal                                                                            | Urticaria<br>l Rash | Eye<br>involvement | Cochlear<br>Inflammation<br>in MRI | Other****                                          |
|---------|-------|-----|-------------------------|--------------------------------------------------------------------------------------------|---------------------|--------------------|------------------------------------|----------------------------------------------------|
| I4      | >70   | F   | No                      | Recurrent short episodes of arthritis/arthralgia                                           | No                  | No                 | Not conducted                      | Rheumatic fever with carditis, ITP*                |
| II2     | 41-45 | F   | No                      | Recurrent short episodes of arthritis/arthralgia as an adolescent post pharyngitis episode | No                  | No                 | No                                 | Suspected Rheumatic fever as a child (no carditis) |
| II4     | 35-40 | M   | PFAPA** - like resolved | No                                                                                         | No                  | No                 | No                                 |                                                    |
| II6     | 35-40 | M   | No                      | No                                                                                         | No                  | No                 | No                                 |                                                    |
| III2    | 6-10  | F   | No                      | No                                                                                         | No                  | No                 | No                                 |                                                    |
| III4    | 6-10  | M   | PFAPA- like resolved    | No                                                                                         | No                  | No                 | No                                 |                                                    |
| III5    | 10-15 | F   | PFAPA- like resolved    | No                                                                                         | No                  | No                 | No                                 |                                                    |

\* ITP- Idiopathic Thrombocytopenic Purpura \*\* PFAPA- periodic fever, aphthous stomatitis, pharyngitis, adenitis \*\*\* Other autoimmune phenomena

488

489 Table 2. Inflammatory markers levels pre- and post- Anakinra

| Patient | <u>Prior to Anakinra Treatment</u> |          |      |              | <u>After 3 months of Anakinra Treatment</u> |     |       |     |
|---------|------------------------------------|----------|------|--------------|---------------------------------------------|-----|-------|-----|
|         | WBC                                | ESR      | CRP  | SAA          | WBC                                         | ESR | CRP   | SAA |
| I4      | 7.2                                | 36       | 0.84 | 5.3          | 4.42                                        | 8   | 0.16  | 2.8 |
| II2     | 7.54                               | 28 (old) | 0.56 | 22.7         | 5                                           | 24  | <0.05 | 4.7 |
| II4     | 6.9                                | 15       | 0.25 | 6.2          | 7.12                                        | 10* | 0.09  | X   |
| II6     | 7                                  | 12       | 0.52 | 5.5          | 7                                           | 5   | 0.07  | X   |
| III2    | 11.13                              | 19       | 0.26 | 4-12.6<br>** | 7.88*                                       | 21* | 0.43* | X   |
| III4    | 10.4                               | 14       | 1.19 | <0.82        | 5.2                                         | 13  | 0.6   | 3   |
| III5    | 6.6                                | 15       | 0.64 | 3.3          | 5.71                                        | 5   | <0.05 | 1   |

\* 1 month after Anakinra initiation \*\* Original levels of SAA were undetectable. However, SAA levels were measured and elevated during sudden hearing loss episode. White blood cells (WBC) K/micl, ESR- mm/1hr, CRP- C reactive protein mg/dL, SAA - Serum Amyloid A mg/l (range 0.0-6.4)

490

491 Table 3. SNHL features and response to Anakinra treatment

| Patient | Description                                | Episode of Unilateral Hearing Loss | Age At Hearing Impairment Onset (years) | Age at Treatment Initiation | Duration of Hearing Impairment Prior to Anakinra Initiation (years) | Response to Treatment (~ 3 months)    |
|---------|--------------------------------------------|------------------------------------|-----------------------------------------|-----------------------------|---------------------------------------------------------------------|---------------------------------------|
| I4      | Severe bilateral progressive SNHL          | Yes                                | 16-20                                   | >70                         | ~50                                                                 | No improvement                        |
| II2     | Severe-moderate bilateral progressive SNHL | No                                 | 16-20                                   | 41-45                       | ~20                                                                 | Mild improvement (asymmetrical)       |
| II4     | Severe-moderate bilateral progressive SNHL | No                                 | 16-20                                   | 35-40                       | ~20                                                                 | Mild improvement (asymmetrical)       |
| II6     | Severe-moderate bilateral progressive SNHL | Yes                                | 16-20                                   | 35-40                       | ~20                                                                 | Minimal-no improvement (asymmetrical) |
| III2    | Moderate unilateral sudden HL              | Yes                                | 6-10                                    | 6-10                        | 0                                                                   | Near-complete resolution of HL        |
| III4    | Mild-moderate bilateral progressive SNHL   | No                                 | 6-10                                    | 6-10                        | 3                                                                   | Complete resolution of HL             |
| III5    | Moderate-severe bilateral progressive SNHL | No                                 | 6-10                                    | 11-15                       | 6                                                                   | Near-complete resolution of HL        |

HL- Hearing Loss, SNHL- Sensorineural Hearing Loss

492

493 **Figures**

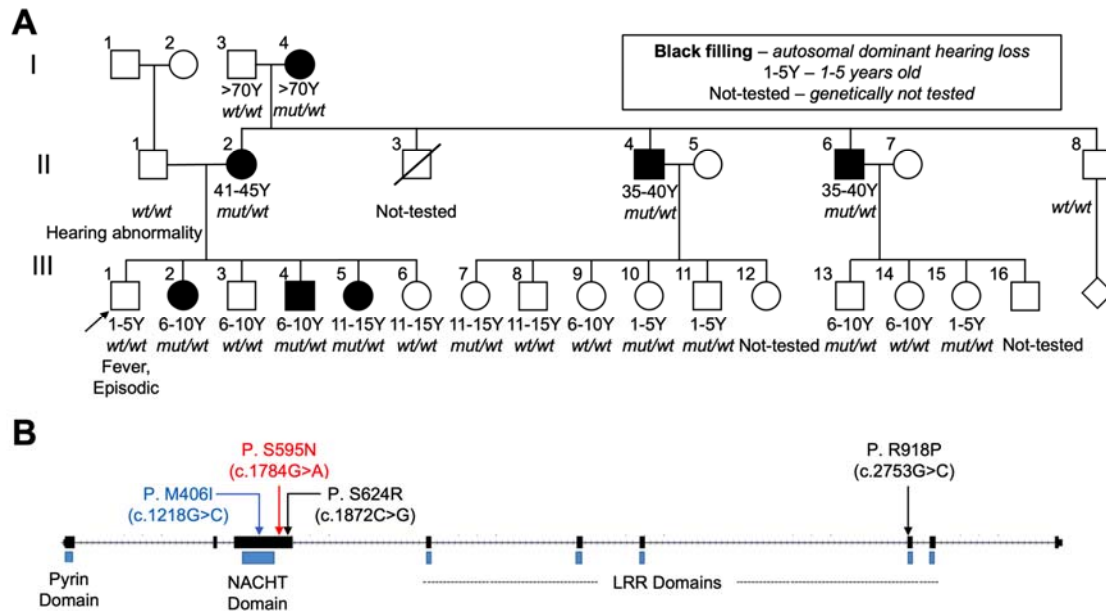

494

495 **Figure 1. Family Pedigree and genetic information**

496 (A) Pedigree of the investigated family. Subjects with autosomal dominant hearing loss are  
 497 represented in green. Asymptomatic carriers and healthy family members are represented in  
 498 white. Carrier status is indicated below each subject. The proband (III1) is indicated by an  
 499 arrow. Pedigree was created using the Invitae family history tool (Invitae Corporation, San  
 500 Francisco, California). (B) **Schematic view of the NLRP3 gene:** Figure adapted from UCSC  
 501 genome browser, based on transcript NM\_001079821.3. The figure shows only coding exons.  
 502 Domain locations according to UniProt track (<https://www.uniprot.org/>) in UCSC genome  
 503 browser (<https://genome.ucsc.edu/>). Variants p.Ser595Asn and p.Met406Ile, reported in this  
 504 paper, are colored in red and blue, respectively. In black, previously reported variants  
 505 p.Ser624Arg and p.Arg918Pro are associated with syndromic/nonsyndromic hearing loss as  
 506 the primary presentation of CAPS [5,18]

507

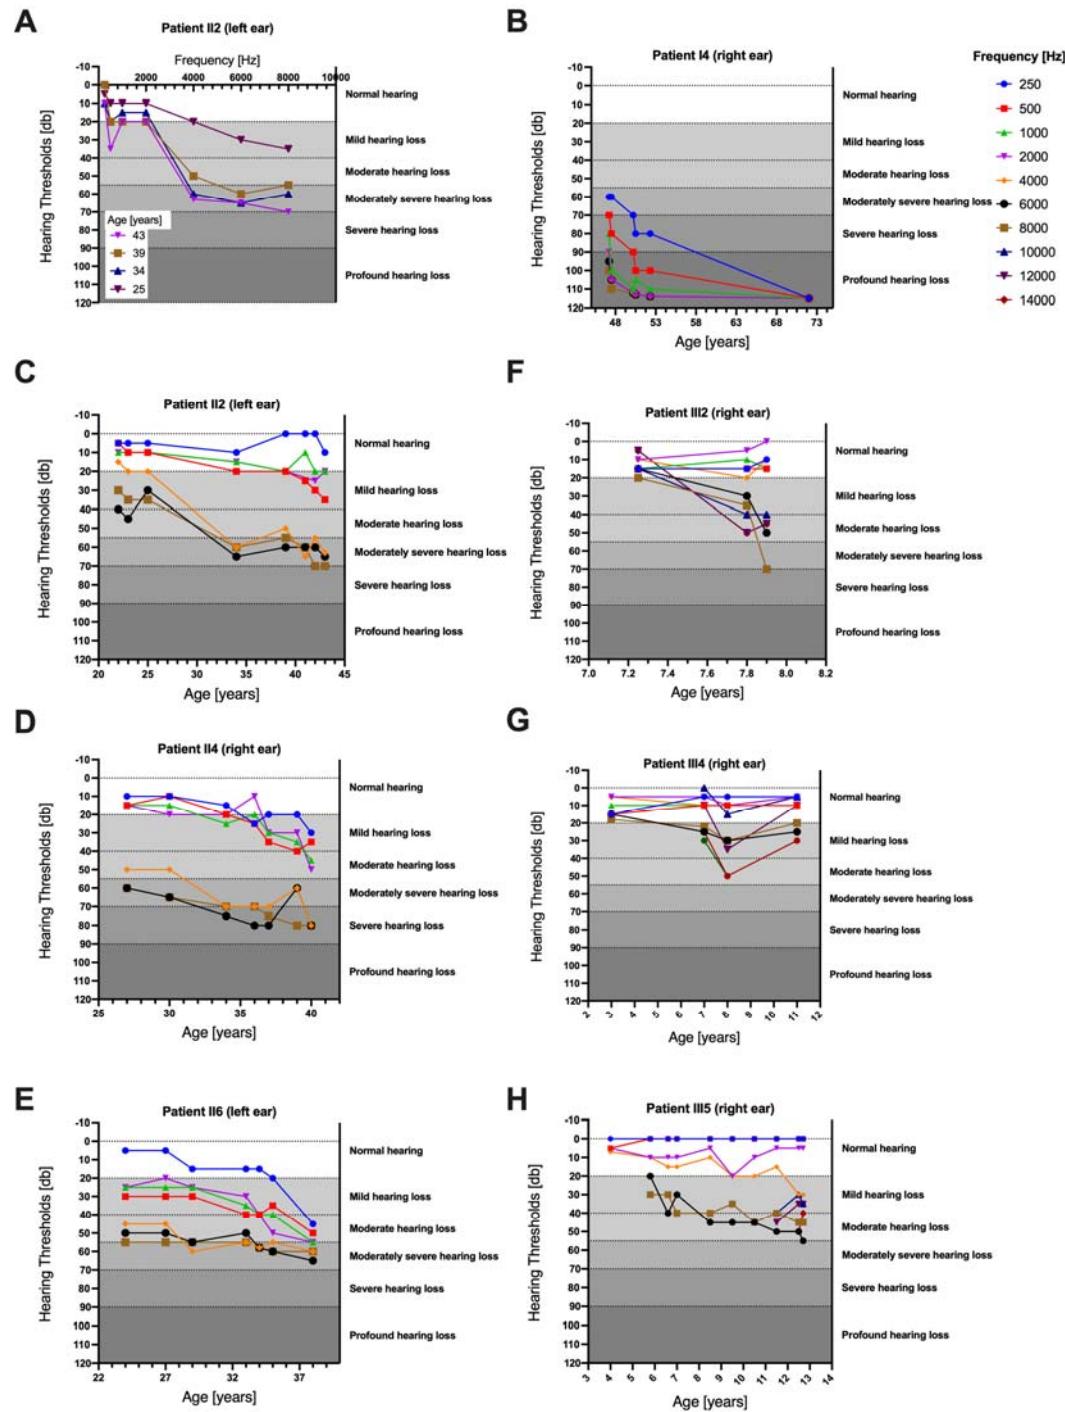

508

509 **Figure 2. Hearing loss over time in symptomatic patients**

510 Air conduction hearing thresholds in the better performing ear (aside from patient III4 who  
 511 suffered from unilateral HL) depicting hearing deterioration over time, prior to Anakinra  
 512 treatment. Patient identification number is shown on the top of each panel. (A) The Y axis  
 513 represents hearing threshold level [dB] and the X axis tested frequency (kHz). (B-H) The Y  
 514 axis represents hearing threshold level [dB] and the X axis age of patient (years). Each graph  
 515 (in different colors) represents a different tested frequency (kHz).

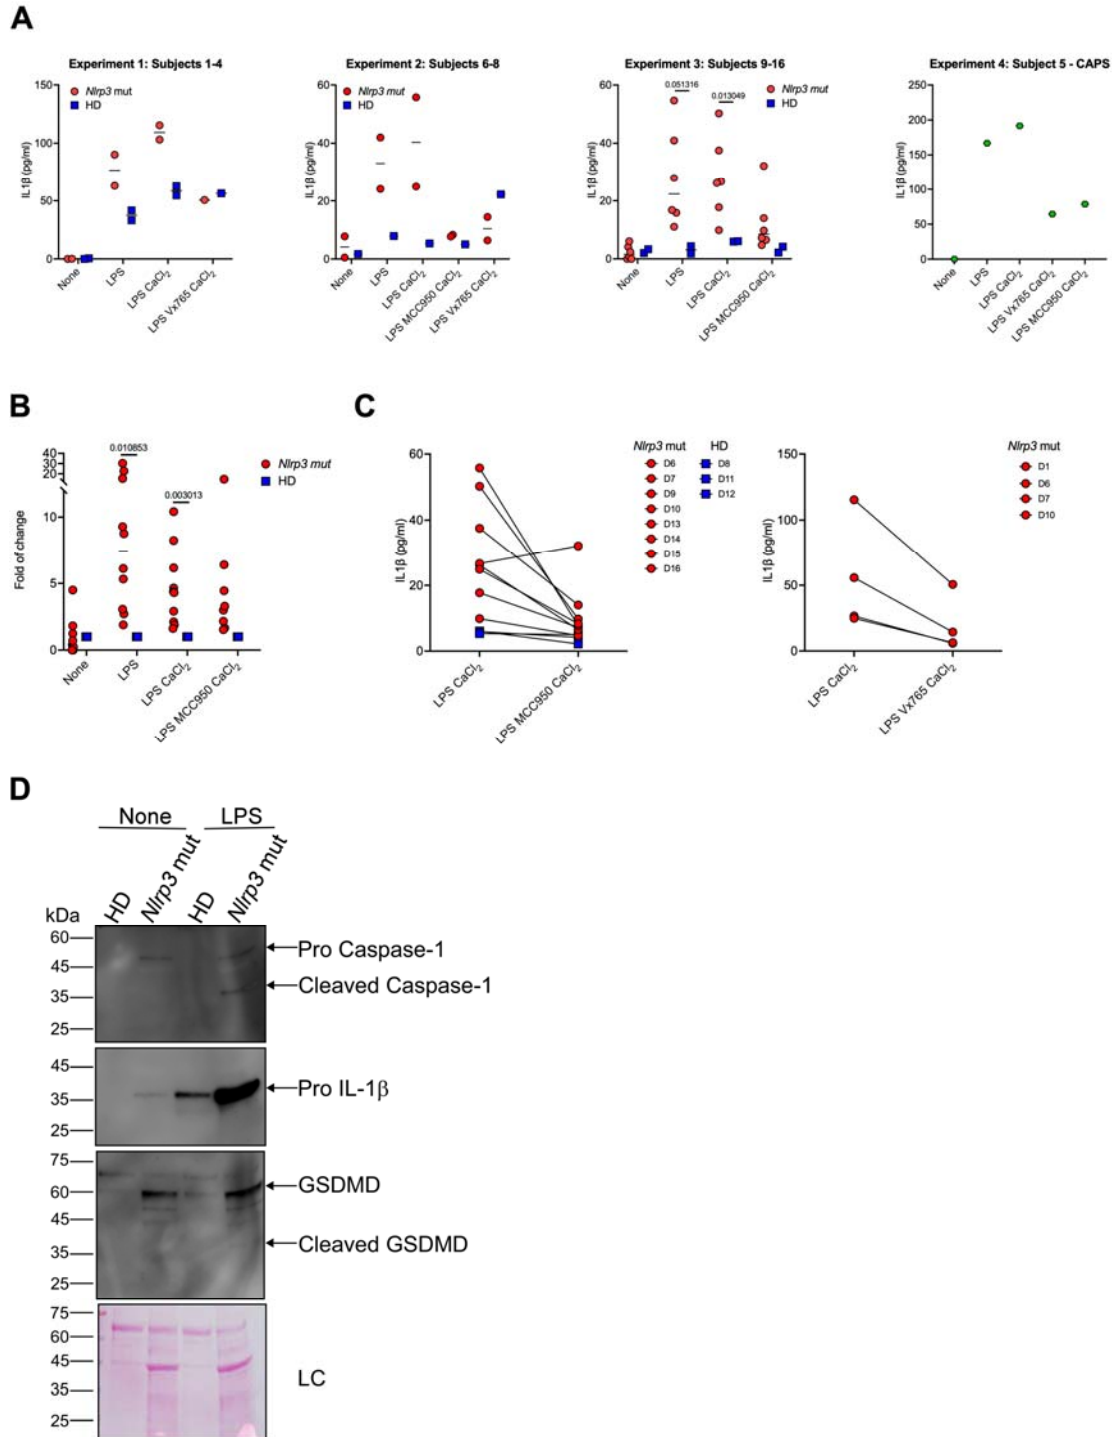

516

517 **Figure 3 Ex-vivo functional assessment of NLRP3 activity**

518 Approximately  $10^5$  PBMCs were seeded into 96-wells plate (D1-D4) or  $10^6$  PBMCs were  
 519 seeded into 24-wells plate (D5-D16). Indicated wells were primed with lipopolysaccharides  
 520 (LPS) (1  $\mu$ g/mL) 3 hours prior to the experiment. Where indicated, MCC950 (2  $\mu$ M) or  
 521 Vx765 (25  $\mu$ M) were added 30 minutes prior to the addition of  $\text{CaCl}_2$  (1 mM). (A) Cell



522 supernatants from each experiment described above were collected 3 hours after  $\text{CaCl}_2$   
523 addition or 6 hours after LPS addition. IL-1 $\beta$  secretion was measured using commercial  
524 ELISA kit. (B) Fold of change (FC) of IL-1 $\beta$  secreted from NLRP3 variant carriers PBMCs  
525 compared to internal healthy control of the same experiment. (C) Change in IL-1 $\beta$  secretion  
526 before and after MCC950 or Vx756 addition. (D) Caspase-1, gasdermin D (GSDMD), and  
527 IL-1 $\beta$  were detected in PBMC lysate by immunoblotting. Statistical comparisons in (B)  
528 between the NLRP3 variant carriers and healthy controls, were performed using multiple  
529 unpaired t-tests,  $P < 0.05$ . In (D) arrows denote the expected.

530

531

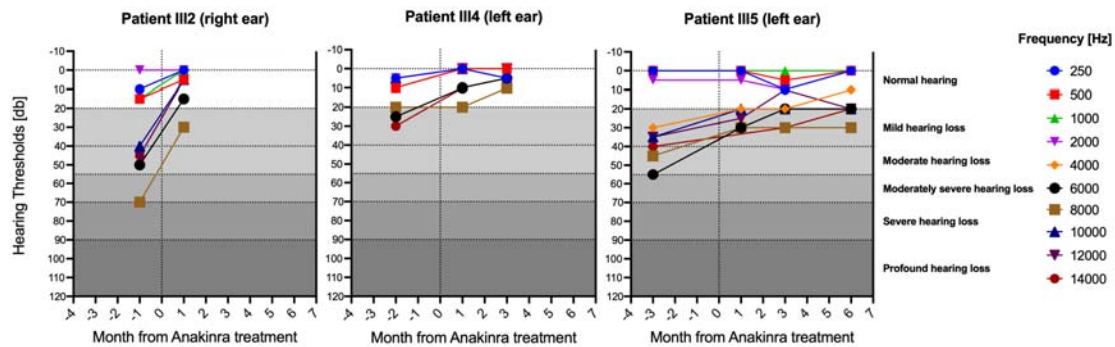

532

533 **Figure 4. Anakinra restores hearing loss in pediatric symptomatic patients**

534 Air conduction hearing thresholds depicting dynamics in hearing function over time, in  
535 response to Anakinra treatment. Patient identification number is shown on the top of each  
536 panel. The Y axis represents hearing threshold level [dB] and the X axis time from treatment  
537 initiation (months). Each graph (in different colors) represents a different tested frequency  
538 (kHz).

539

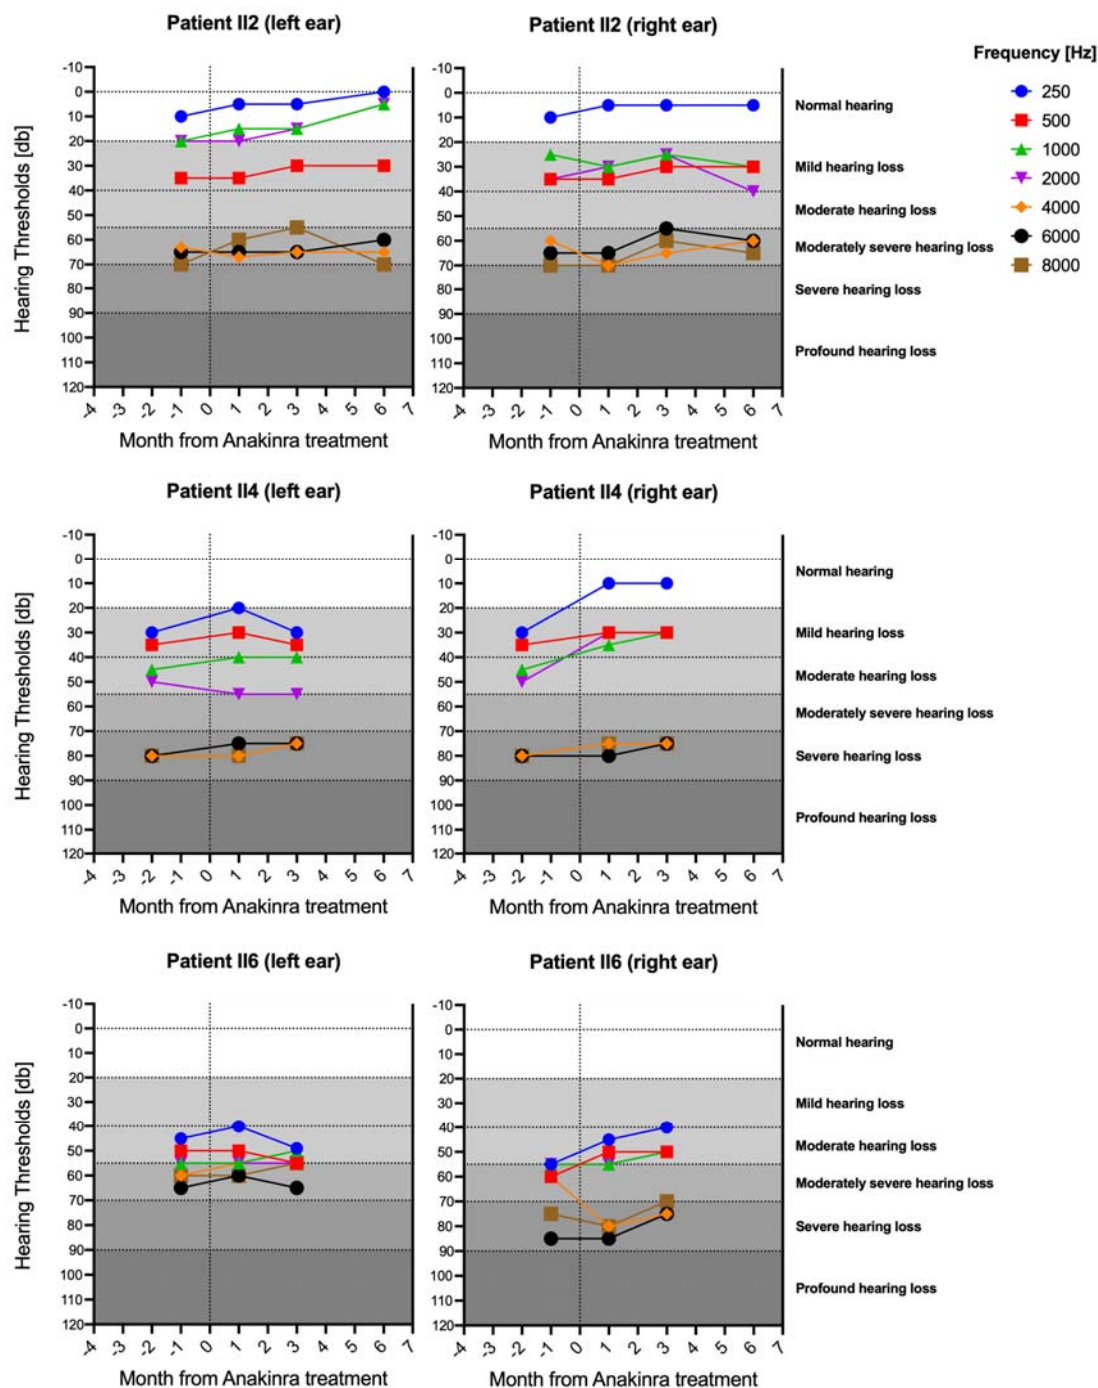

540

541 **Figure 5. Anakinra slightly improves hearing loss in adult symptomatic patients**

542 Air conduction hearing thresholds depicting dynamics in hearing function over time, in  
 543 response to Anakinra treatment. Patient identification number is shown on the top of each  
 544 panel. The Y axis represents hearing threshold level [dB] and the X axis time from treatment  
 545 initiation (months). Each graph (in different colors) represents a different tested frequency  
 546 (kHz).

547

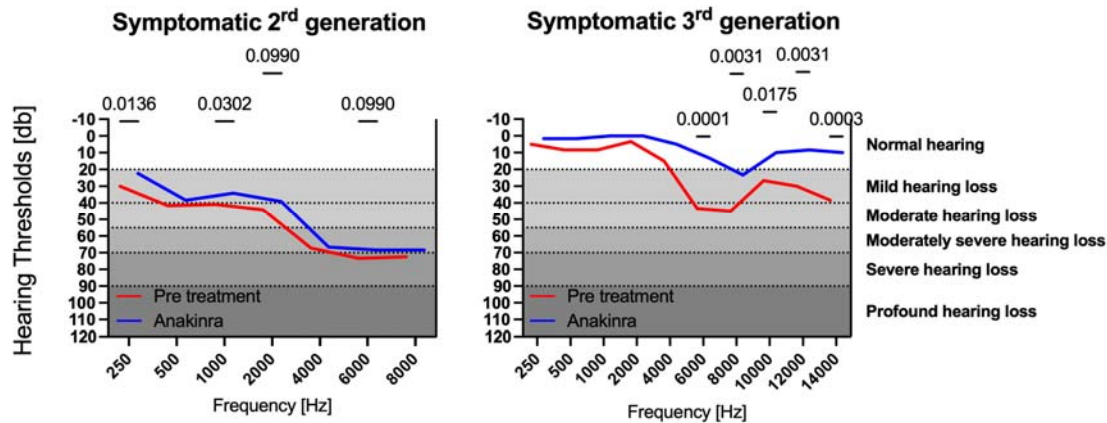

548

549 **Figure 6. Comparison of hearing loss Anakinra restoration in adults and pediatric**  
550 **symptomatic patients**

551 Air conduction hearing thresholds representing dynamics of hearing function one month after  
552 initiation of Anakinra treatment in 2<sup>nd</sup> (N=3, both ears were tested) and 3<sup>rd</sup> (N=3, one ear, the  
553 affected ear was tested) generation patients (left and right panel, respectively). Generation  
554 specified on the top of each panel. The Y axis represents the hearing threshold level [dB], and  
555 the X axis tests frequency (kHz). Averages of pre-treatment is represented in red and post-  
556 treatment in blue. In the Statistical comparisons between the pre- and post-treatment were  
557 performed using two-way ANOVA (Fisher's LSD test), Significant ( $P < 0.05$ ) is shown.

558

## 559 **Supplemental material**

### 560 **Peripheral blood mononuclear cells (PBMCs) isolation**

561 PBMCs were isolated from peripheral venous blood samples freshly drawn from subjects 1-  
562 16. Briefly, 10-30 ml of peripheral blood were collected and loaded on Histopaque-1077  
563 (Sigma Aldrich 10771). Cells were centrifuged for 30 min at 400 g at 24°C. Cells from the  
564 interphase were collected and washed with PBS. Samples of the cells were then stained for  
565 flow cytometry to determine the percentage and concentration of monocytes, before they  
566 were seeded in a 96-wells plate or a 24-wells plate at a final concentration of 10<sup>6</sup>  
567 monocytes/ml, in DMEM supplemented with 10% heat-inactivated fetal bovine serum (FBS)  
568 (Gibco, 10270106). After 18 h, the wells were washed three times to remove non-adherent  
569 cells and medium was replaced with DMEM supplemented with 1% FBS. Cells were treated  
570 with 1ug/mL ultrapure LPS. After 3 hours of LPS treatment, 2 ug/mL MCC950 or 25 μM  
571 Vx765 were added to selected wells for 30 minutes prior to adding 1mM CaCl<sub>2</sub> for 3 hours.  
572 After 3 hours cell supernatants and cell lysates were collected for further analysis by ELISA  
573 or immunoblot, respectively. Experiments were performed according to the guidelines of the  
574 Institute's Helsinki Ethics Committee.

### 575 **Immunoblot analysis of proteins**

576 Cells were collected and centrifuged for five minutes at 400xg in order to separate them from  
577 the supernatant. Next, the cells were lysed by using RIPA buffer in the presence of protease  
578 inhibitors at 4°C for 15 min. Lysed cells were loaded onto any kD gradient Criterion TGX-  
579 Free precast gels (Bio-Rad, Hercules, California, USA). Proteins were transferred onto a  
580 nitrocellulose membrane (Bio-Rad), and Ponceau S staining was performed routinely to  
581 evaluate the loading accuracy. Membranes were blocked with 5% (w/v) skim milk in TBS for  
582 1–2 h, and then probed overnight with primary antibodies (all diluted 1:1000, unless noted  
583 otherwise): pro and cleaved human-IL-1 β (R&D, AF-201-NA), pro and cleaved human  
584 caspase-1 (Merck, 06-503-I), and pro and cleaved human-GSDMD (abcam, ab210070).  
585 Relevant horseradish peroxidase-conjugated secondary antibodies were applied for at least 1  
586 hour. Membranes were washed between antibody incubations four times in TBS containing  
587 0.1% (v/v) Tween 20 (TBST). Antibodies were diluted in TBST containing 5% skim milk.  
588 Immunoblots were developed using an ECL kit (Bio-Rad) in an ODYSSEY Fc (Li-COR,  
589 Lincoln, Nebraska USA) equipped with Image Lab software. All images were cropped for  
590 presentation. Full-size images will be presented upon request.

### 591 **Reagents**

592 Unless stated otherwise, all cell culture reagents were purchased from Biological  
593 Industries, Beit-Haemek, Israel. Lipopolysaccharides (LPS) of Escherichia coli O111:B4  
594 were purchased from Sigma-Aldrich (#L3024, Munich, Germany). Vx765 and MCC950 and  
595 ELISA kit were purchased from Invitrogen (Waltham, Massachusetts, USA). HRP-  
596 conjugated secondary antibodies were purchased from Jackson ImmunoResearch Labs (West  
597 Grove, PA, USA).

598

599 **Supplemental Figures**

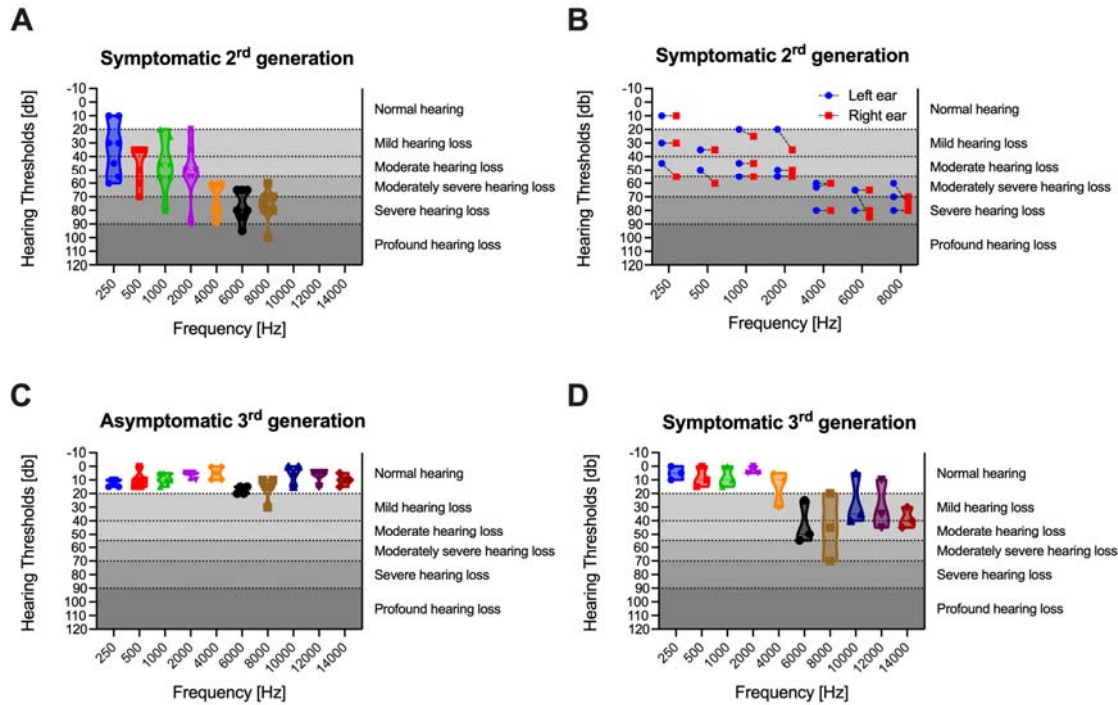

600

601 **Supplemental Figure 1. Hearing loss 2<sup>nd</sup> and 3<sup>rd</sup> generation patients**

602 Pooled same-generation auditory phenotypes based on generation and hearing loss status are  
603 stated on the top of each panel. Although hearing loss severity per tested frequency varied  
604 among patients, overall, the high-ultrahigh hearing range is most severely affected (panels A,  
605 D).
